# Supplementary material for: Highly photoluminescent silicon nanocrystals for rapid, label-free and recyclable detection of mercuric ions
Source: Royal Society of Chemistry journal article supplement (doi:10.1039/c3nr05896d), 2014-01-01
Supplement: c3nr05896d.pdf [file c3nr05896d.pdf]

## Supplementary Information

# Highly photoluminescent silicon nanocrystals for rapid, label-free and recyclable detection of mercuric ions

Jia Zhang and Shu-Hong Yu\*

*Division of Nanomaterials and Chemistry, Hefei National Laboratory for Physical Sciences at Microscale, Collaborative Innovation Center of Suzhou Nano Science and Technology, Department of Chemistry, University of Science and Technology of China, Hefei, Anhui 230026, P. R. China*

\* To whom correspondence should be addressed. E-mail: shyu@ustc.edu.cn

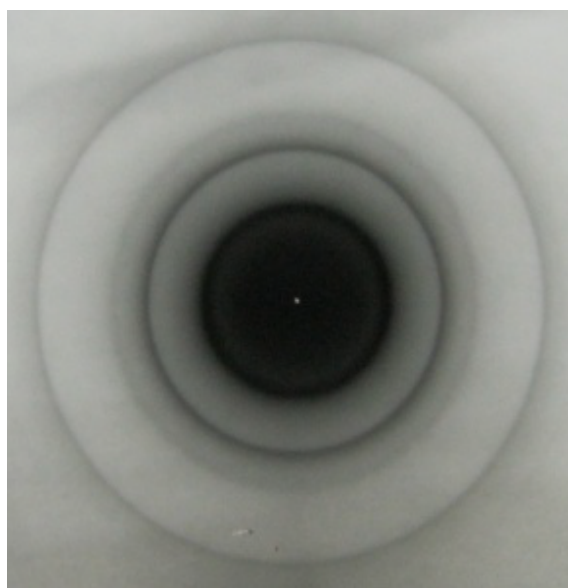

**Fig. S1** The selected-area electron diffraction pattern of the SiNCs.

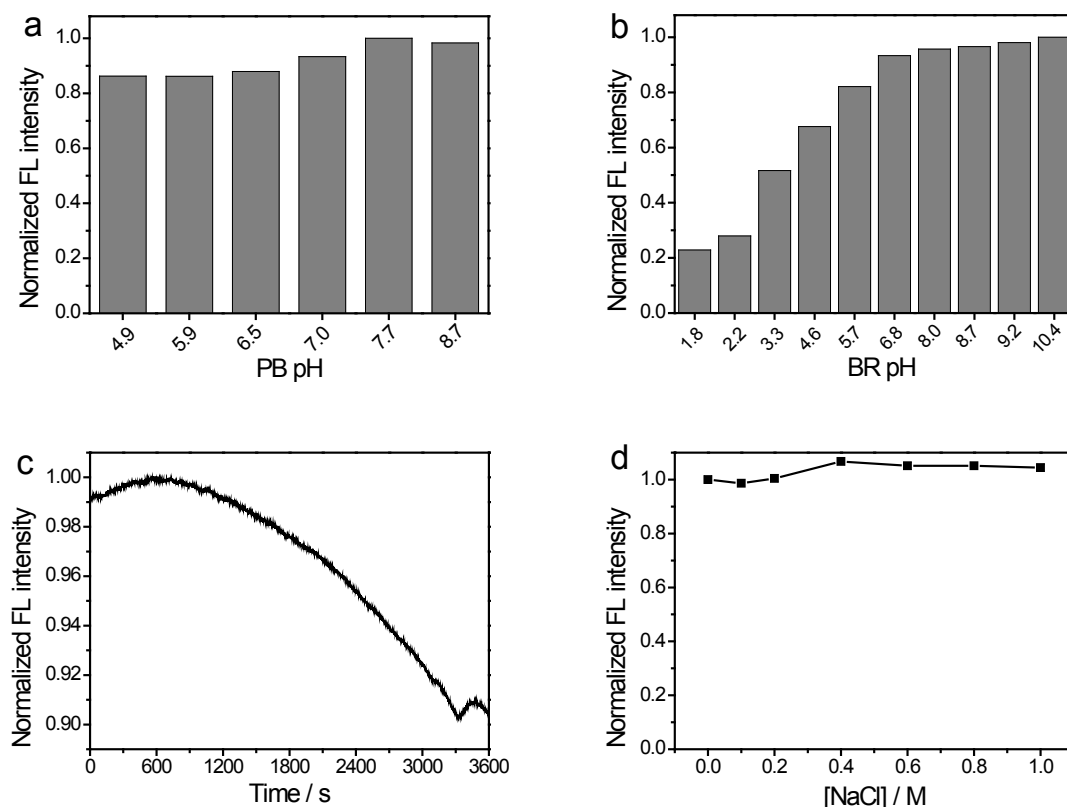

**Fig. S2** pH-dependent FL intensity of the SiNCs solution with respect to (a) Britton-Robinson buffer and (b) phosphate buffer. (c) Stability investigation of the SiNCs solution under constant irradiation for 1 h. (d) The effect of salt concentration on the FL intensity of the SiNCs solution.

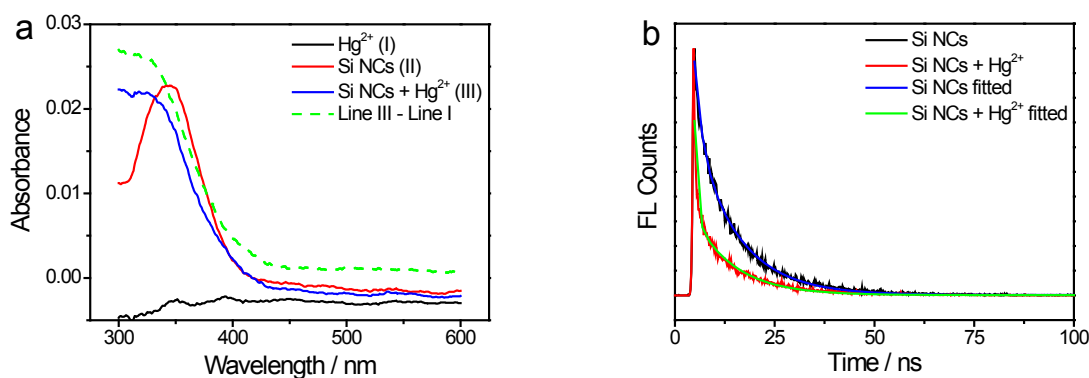

**Fig. S3** (a) UV-Vis optical absorption spectra for the investigation of the interaction between SiNCs and  $\text{Hg}^{2+}$ . (b) The fluorescence decay curve of SiNCs in the absence and presence of  $\text{Hg}^{2+}$ .

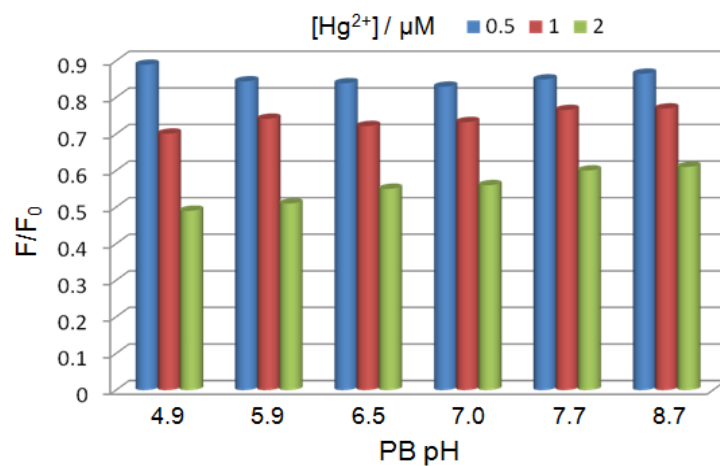

**Fig. S4** The effect of phosphate buffer pH on the mercury detection for three concentrations. The data are based on the average of two repetitive measurements.

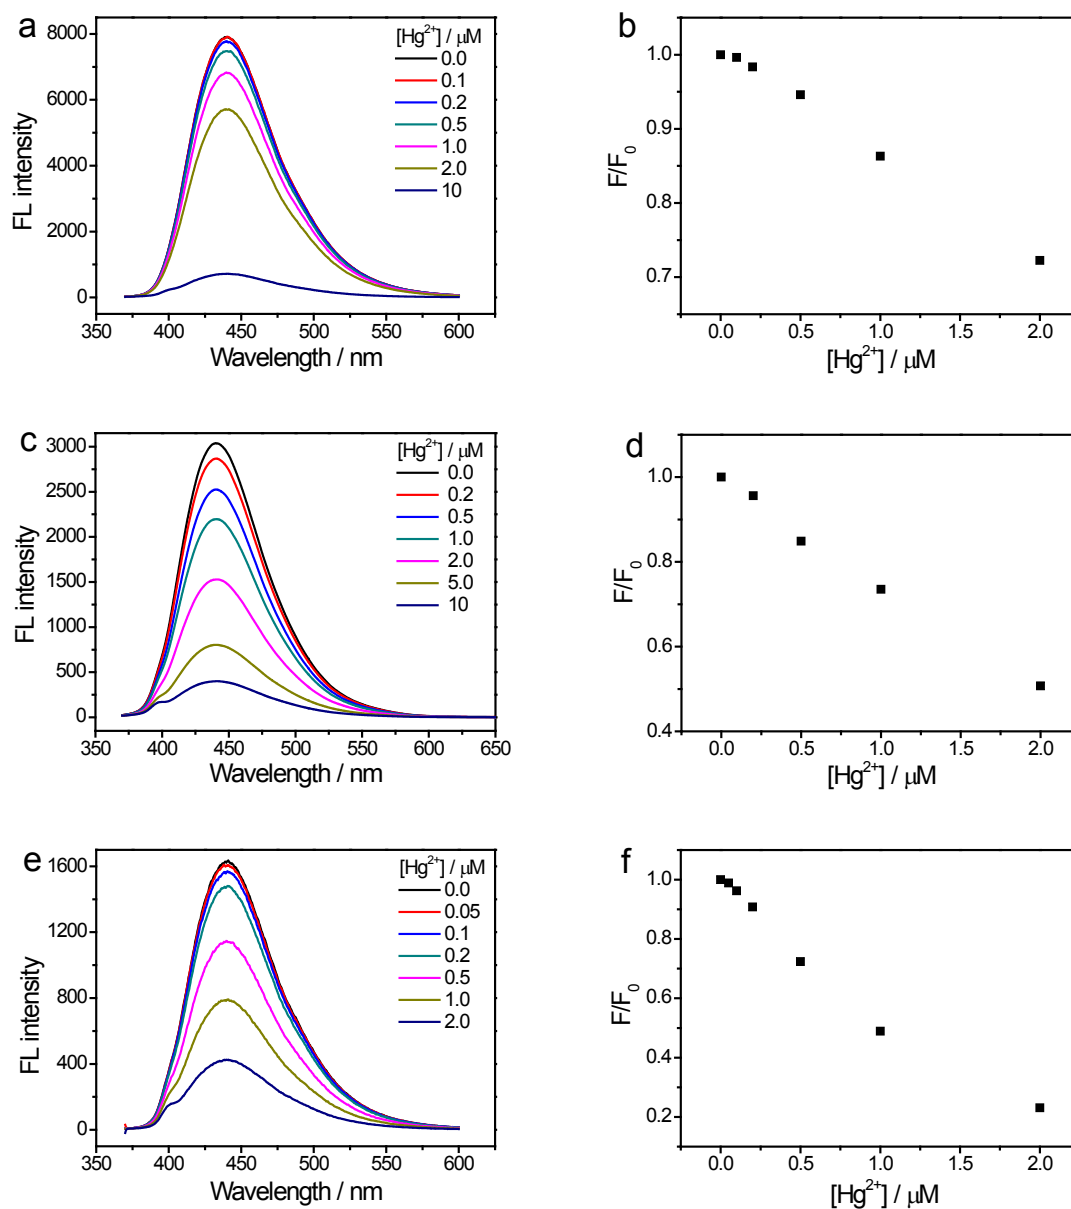

**Fig. S5** Effect of SiNCs concentration on the mercury detection in phosphate buffer (20 mM, pH 5.9). The absorbance at 350 nm for the SiNCs was equal to 0.06 (a, b), 0.023 (c, d) and 0.013 (e, f), respectively, representing three SiNCs concentrations. The  $F/F_0$  versus mercury concentration plot data are based on the average of two repetitive measurements.

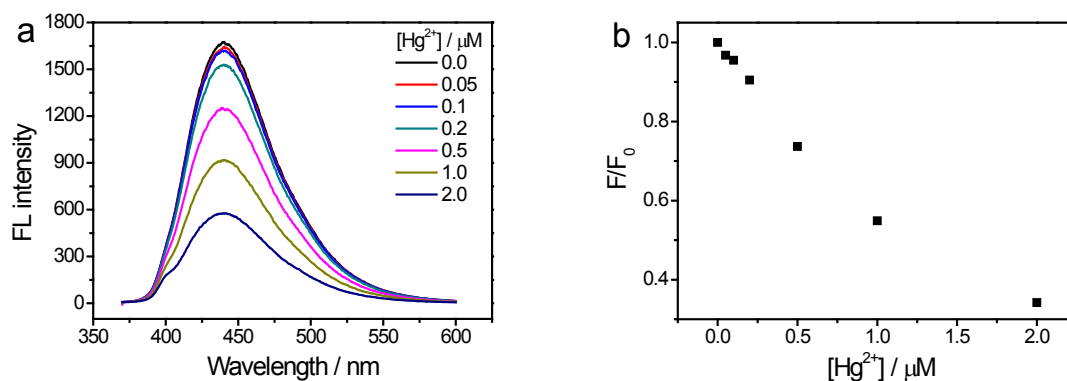

**Fig. S6** Mercury detection by the SiNCs in citrate buffer (20 mM, pH 5.9). The absorbance at 350 nm for the SiNCs was equal to 0.013.

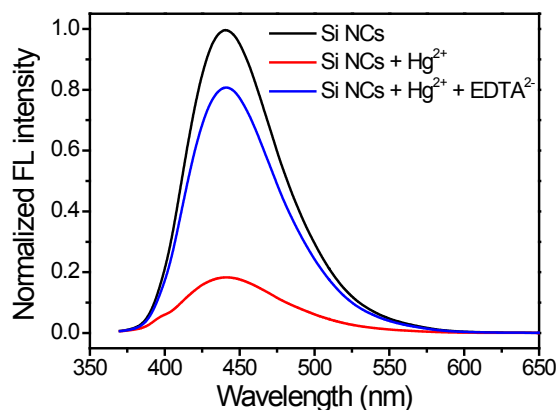

**Fig. S7** FL recovery test of the SiNCs probe ( $A_{350\text{nm}} = 0.023$ ) in phosphate buffer (20 mM, pH 5.9) in the presence of  $\text{Hg}^{2+}$  (5  $\mu\text{M}$ ) by the addition of  $\text{Na}_2\text{EDTA}$  (50  $\mu\text{M}$ ).

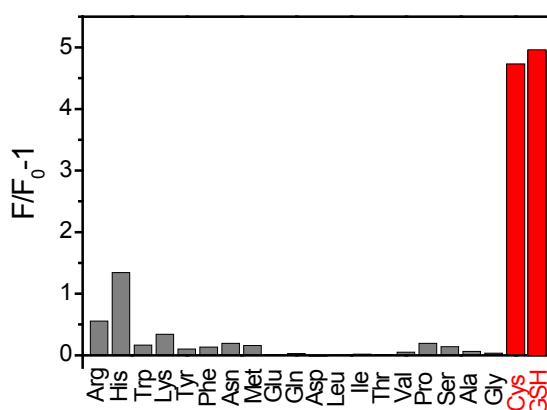

**Fig. S8** FL recovery test of the SiNCs probe ( $A_{350\text{nm}} = 0.023$ ) in phosphate buffer (20 mM, pH 5.9) in the presence of  $\text{Hg}^{2+}$  (5  $\mu\text{M}$ ) by the addition of amino acids and glutathione (all 10  $\mu\text{M}$ ).

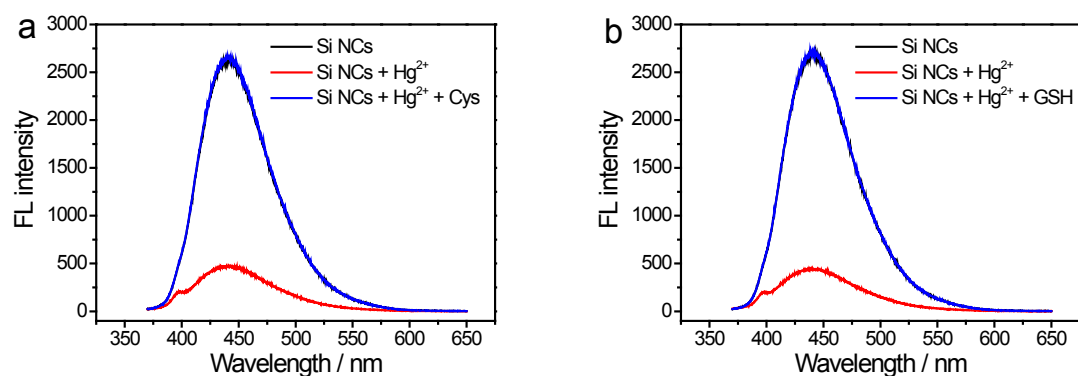

**Fig. S9** Recyclable test of the SiNCs sensor in phosphate buffer (20 mM, pH 5.9) for the mercury assay by the addition of (a) cysteine (Cys) and (b) glutathione (GSH).

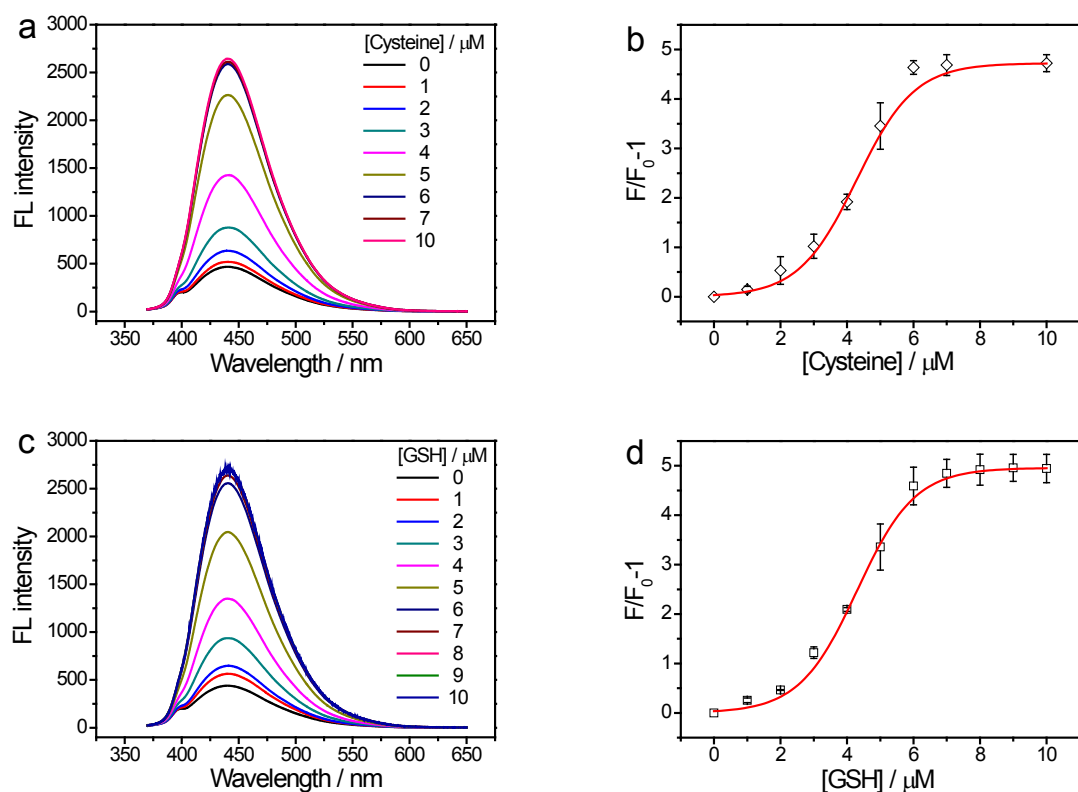

**Fig. S10** FL recovery for the SiNCs solution in phosphate buffer (20 mM, pH 5.9) in the presence of  $\text{Hg}^{2+}$  (5  $\mu\text{M}$ ) by the addition of various concentrations of cysteine (a, b) and glutathione (c, d).

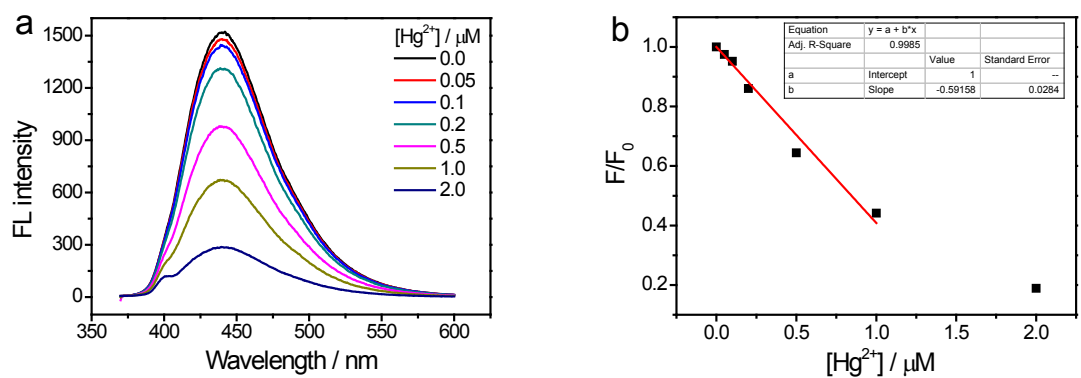

**Fig. S11** Mercury detection by the SiNCs probe ( $A_{350\text{nm}} = 0.013$ ) in acetate buffer (20 mM, pH 5.9), after five cyclable regeneration by the use of cysteine. The  $F/F_0$  versus mercury concentration plot data are based on the average of two repetitive measurements.
